# Supplementary material
Source: PubMed Central journal article supplement (PMC11580092)
Supplement: NIHMS2032646-supplement-Trends_Supplementary_Material.pdf [file NIHMS2032646-supplement-Trends_Supplementary_Material.pdf]

Supplementary table 1: Standard errors for prevalence by country, age and sex

|               | Wave<br>1/2 | Wave 4 |               | Wave<br>1/2 | Wave 4 |
|---------------|-------------|--------|---------------|-------------|--------|
| Austria       |             |        | Italy         |             |        |
| Total         | 0.960       | 0.704  | Total         | 0.675       | 0.840  |
| Males 59-59   | 2.338       | 1.726  | Males 59-59   | 1.702       | 2.068  |
| 60-69         | 2.501       | 1.906  | 60-69         | 1.797       | 2.275  |
| 70+           | 2.673       | 1.824  | 70+           | 1.750       | 2.069  |
| Females 50-59 | 2.320       | 1.719  | Females 50-59 | 1.693       | 2.127  |
| 60-69         | 2.352       | 1.784  | 60-69         | 1.660       | 2.085  |
| 70+           | 2.018       | 1.446  | 70+           | 1.279       | 1.490  |
| Belgium       |             |        | Netherlands   |             |        |
| Total         | 0.609       | 0.684  | Total         | 0.664       | 0.945  |
| Males 59-59   | 1.474       | 1.699  | Males 59-59   | 1.455       | 2.226  |
| 60-69         | 1.657       | 1.827  | 60-69         | 1.702       | 2.280  |
| 70+           | 1.567       | 1.795  | 70+           | 1.783       | 2.507  |
| Females 50-59 | 1.468       | 1.650  | Females 50-59 | 1.511       | 2.304  |
| 60-69         | 1.594       | 1.741  | 60-69         | 1.735       | 2.335  |
| 70+           | 1.234       | 1.389  | 70+           | 1.567       | 2.195  |
| Czech         |             |        | Poland        |             |        |
| Total         | 0.940       | 0.664  | Total         | 1.002       | 1.184  |
| Males 59-59   | 2.189       | 1.667  | Males 59-59   | 2.266       | 3.213  |
| 60-69         | 2.587       | 1.644  | 60-69         | 2.998       | 2.855  |
| 70+           | 2.837       | 1.873  | 70+           | 2.939       | 3.417  |
| Females 50-59 | 2.046       | 1.646  | Females 50-59 | 2.189       | 2.964  |
| 60-69         | 2.264       | 1.499  | 60-69         | 2.502       | 2.671  |
| 70+           | 2.007       | 1.337  | 70+           | 1.958       | 2.376  |
| Denmark       |             |        | Spain         |             |        |
| Total         | 0.777       | 1.064  | Total         | 0.734       | 0.823  |
| Males 59-59   | 1.790       | 2.598  | Males 59-59   | 1.714       | 2.045  |
| 60-69         | 1.970       | 2.604  | 60-69         | 1.996       | 2.135  |
| 70+           | 2.159       | 2.810  | 70+           | 1.856       | 2.069  |
| Females 50-59 | 1.816       | 2.648  | Females 50-59 | 1.798       | 2.064  |
| 60-69         | 1.936       | 2.552  | 60-69         | 1.837       | 1.999  |
| 70+           | 1.801       | 2.429  | 70+           | 1.434       | 1.479  |

|               |        |        |               |        |        |
|---------------|--------|--------|---------------|--------|--------|
| France        |        |        | Sweden        |        |        |
| Total         | 0.657  | 0.652  | Total         | 0.670  | 1.128  |
| Males 59-59   | 1.531  | 1.600  | Males 59-59   | 1.559  | 3.114  |
| 60-69         | 1.886  | 1.798  | 60-69         | 1.774  | 2.596  |
| 70+           | 1.754  | 1.717  | 70+           | 1.756  | 2.867  |
| Females 50-59 | 1.495  | 1.579  | Females 50-59 | 1.583  | 3.009  |
| 60-69         | 1.782  | 1.658  | 60-69         | 1.743  | 2.658  |
| 70+           | 1.359  | 1.327  | 70+           | 1.451  | 2.458  |
| Germany       |        |        | Switzerland   |        |        |
| Total         | 0.672  | 1.184  | Total         | 1.009  | 0.826  |
| Males 59-59   | 1.675  | 3.188  | Males 59-59   | 2.325  | 1.940  |
| 60-69         | 1.681  | 3.023  | 60-69         | 2.630  | 2.125  |
| 70+           | 1.855  | 3.056  | 70+           | 2.710  | 2.161  |
| Females 50-59 | 1.676  | 3.109  | Females 50-59 | 2.343  | 2.009  |
| 60-69         | 1.628  | 2.881  | 60-69         | 2.631  | 2.086  |
| 70+           | 1.398  | 2.333  | 70+           | 2.245  | 1.807  |
| Austria       |        |        | Italy         |        |        |
|               | Wave 5 | Wave 6 |               | Wave 5 | Wave 6 |
| Total         | 0.730  | 0.835  | Total         | 0.732  | 0.694  |
| Males 59-59   | 1.696  | 1.959  | Males 59-59   | 1.779  | 1.629  |
| 60-69         | 1.901  | 2.137  | 60-69         | 1.970  | 1.820  |
| 70+           | 1.854  | 2.081  | 70+           | 1.791  | 1.688  |
| Females 50-59 | 1.701  | 2.066  | Females 50-59 | 1.825  | 1.702  |
| 60-69         | 1.871  | 2.047  | 60-69         | 1.882  | 1.789  |
| 70+           | 1.616  | 1.854  | 70+           | 1.285  | 1.256  |
| Belgium       |        |        | Luxembourg    |        |        |
| Total         | 0.664  | 0.662  | Total         | 1.246  | 1.266  |
| Males 59-59   | 1.550  | 1.578  | Males 59-59   | 2.832  | 2.708  |
| 60-69         | 1.694  | 1.713  | 60-69         | 3.094  | 3.196  |
| 70+           | 1.674  | 1.639  | 70+           | 3.305  | 3.286  |
| Females 50-59 | 1.605  | 1.587  | Females 50-59 | 2.930  | 3.007  |
| 60-69         | 1.757  | 1.716  | 60-69         | 3.268  | 3.232  |
| 70+           | 1.452  | 1.443  | 70+           | 2.854  | 2.938  |

|               |       |       |               |       |       |
|---------------|-------|-------|---------------|-------|-------|
| Czech         |       |       | Slovenia      |       |       |
| Total         | 0.671 | 0.723 | Total         | 0.928 | 0.773 |
| Males 59-59   | 1.527 | 1.803 | Males 59-59   | 2.023 | 1.831 |
| 60-69         | 1.658 | 1.797 | 60-69         | 2.430 | 1.923 |
| 70+           | 1.910 | 1.989 | 70+           | 2.486 | 2.137 |
| Females 50-59 | 1.598 | 1.809 | Females 50-59 | 2.231 | 1.926 |
| 60-69         | 1.578 | 1.681 | 60-69         | 2.386 | 1.902 |
| 70+           | 1.484 | 1.556 | 70+           | 1.894 | 1.561 |
| Denmark       |       |       | Spain         |       |       |
| Total         | 0.730 | 0.779 | Total         | 0.618 | 0.671 |
| Males 59-59   | 1.716 | 1.896 | Males 59-59   | 1.391 | 1.474 |
| 60-69         | 1.676 | 1.872 | 60-69         | 1.647 | 1.838 |
| 70+           | 1.813 | 1.858 | 70+           | 1.550 | 1.666 |
| Females 50-59 | 1.887 | 2.028 | Females 50-59 | 1.484 | 1.578 |
| 60-69         | 1.798 | 1.948 | 60-69         | 1.608 | 1.824 |
| 70+           | 1.751 | 1.794 | 70+           | 1.138 | 1.212 |
| Estonia       |       |       | Sweden        |       |       |
| Total         | 0.665 | 0.671 | Total         | 0.723 | 0.776 |
| Males 59-59   | 1.709 | 1.646 | Males 59-59   | 1.811 | 1.862 |
| 60-69         | 1.870 | 1.948 | 60-69         | 1.657 | 1.831 |
| 70+           | 1.933 | 1.980 | 70+           | 1.680 | 1.781 |
| Females 50-59 | 1.594 | 1.566 | Females 50-59 | 1.929 | 2.111 |
| 60-69         | 1.596 | 1.631 | 60-69         | 1.804 | 1.958 |
| 70+           | 1.294 | 1.309 | 70+           | 1.625 | 1.728 |
| France        |       |       | Switzerland   |       |       |
| Total         | 0.747 | 0.801 | Total         | 0.814 | 0.867 |
| Males 59-59   | 1.879 | 2.020 | Males 59-59   | 1.782 | 2.050 |
| 60-69         | 1.947 | 2.082 | 60-69         | 1.914 | 2.051 |
| 70+           | 1.953 | 2.088 | 70+           | 2.071 | 2.126 |
| Females 50-59 | 1.834 | 1.967 | Females 50-59 | 2.010 | 2.102 |
| 60-69         | 1.886 | 1.951 | 60-69         | 2.029 | 2.287 |
| 70+           | 1.481 | 1.624 | 70+           | 1.951 | 2.014 |
| Germany       |       |       |               |       |       |
| Total         | 0.656 | 0.740 |               |       |       |
| Males 59-59   | 1.599 | 1.786 |               |       |       |
| 60-69         | 1.715 | 1.956 |               |       |       |
| 70+           | 1.547 | 1.748 |               |       |       |
| Females 50-59 | 1.640 | 1.861 |               |       |       |
| 60-69         | 1.726 | 1.928 |               |       |       |
| 70+           | 1.390 | 1.590 |               |       |       |

Supplementary table 2: Complete results for multilevel models

Wave 1 (2004) through Wave 4 (2011)

Model 1 (Base)

Log pseudolikelihood = -64354.696

|            | Coef.     | Std. Err. | z     | P>z   | [95% Conf. Interval] |           |
|------------|-----------|-----------|-------|-------|----------------------|-----------|
| time       | .0219413  | .0068711  | 3.19  | 0.001 | .0084743             | .0354083  |
| age        | .0145427  | .0032799  | 4.43  | 0.000 | .0081143             | .0209712  |
| female     | .3864837  | .0570134  | 6.78  | 0.000 | .2747395             | .498228   |
| _cons      | -1.028699 | .2147264  | -4.79 | 0.000 | -1.449555            | -.6078431 |
| country    |           |           |       |       |                      |           |
| var(time)  | .0004351  | .0001446  |       |       | .0002268             | .0008348  |
| var(_cons) | .0595387  | .0218643  |       |       | .0289877             | .1222884  |

Model 2

Log pseudolikelihood = -64348.459

|            | Coef.     | Std. Err | z     | P>z   | [95% Conf. Interval] |           |
|------------|-----------|----------|-------|-------|----------------------|-----------|
| time       | .0221619  | .0068562 | 3.23  | 0.001 | .0087241             | .0355998  |
| age        | .0140548  | .0033331 | 4.22  | 0.000 | .0075221             | .0205875  |
| female     | .3772662  | .0576239 | 6.55  | 0.000 | .2643255             | .4902069  |
| married    | -.0513329 | .0215351 | -2.38 | 0.017 | -.093541             | -.0091248 |
| _cons      | -.958526  | .2202838 | -4.35 | 0.000 | -1.390274            | -.5267777 |
| country    |           |          |       |       |                      |           |
| var(time)  | .0004273  | .0001422 |       |       | .0002226             | .0008201  |
| var(_cons) | .0593698  | .0217075 |       |       | .0289961             | .1215603  |

Model 3

Log pseudolikelihood = -64168.039

|            | Coef.     | Std. Err | z      | P>z   | [95% Conf. Interval] |           |
|------------|-----------|----------|--------|-------|----------------------|-----------|
| time       | .0258188  | .0066827 | 3.86   | 0.000 | .012721              | .0389166  |
| age        | .0118474  | .0030855 | 3.84   | 0.000 | .0057999             | .0178948  |
| female     | .3640217  | .0585361 | 6.22   | 0.000 | .2492931             | .4787504  |
| isced2     | -.1431776 | .0470975 | -3.04  | 0.002 | -.235487             | -.0508681 |
| isced3     | -.3536674 | .0302629 | -11.69 | 0.000 | -.4129816            | -.2943531 |
| _cons      | -.7142868 | .1991894 | -3.59  | 0.000 | -1.104691            | -.3238827 |
| country    |           |          |        |       |                      |           |
| var(time)  | .0004428  | .0001423 |        |       | .0002358             | .0008315  |
| var(_cons) | .056555   | .0217527 |        |       | .0266118             | .1201898  |

#### Model 4

Log pseudolikelihood = -58042.628

|            | Coef.     | Std. Err. | z     | P>z   | [95% Conf. Interval] |           |
|------------|-----------|-----------|-------|-------|----------------------|-----------|
| time       | .0195525  | .0078696  | 2.48  | 0.013 | .0041284             | .0349766  |
| age        | .0007041  | .0028826  | 0.24  | 0.807 | -.0049456            | .0063538  |
| female     | .2447268  | .0426436  | 5.74  | 0.000 | .1611469             | .3283067  |
| arthritis  | 2.086509  | .0695102  | 30.02 | 0.000 | 1.950272             | 2.222747  |
| heartdis   | .3481206  | .0233901  | 14.88 | 0.000 | .3022769             | .3939644  |
| diabetes   | .2656758  | .0408956  | 6.50  | 0.000 | .1855219             | .3458298  |
| ld         | .3739006  | .0329563  | 11.35 | 0.000 | .3093074             | .4384938  |
| cancer     | .0342225  | .0327889  | 1.04  | 0.297 | -.0300425            | .0984875  |
| stroke     | .1687422  | .0443858  | 3.80  | 0.000 | .0817476             | .2557368  |
| _cons      | -.5131387 | .1985542  | -2.58 | 0.010 | -.9022979            | -.1239796 |
| country    |           |           |       |       |                      |           |
| var(time)  | .0005595  | .000186   |       |       | .0002917             | .0010734  |
| var(_cons) | .060359   | .0205504  |       |       | .0309695             | .1176385  |

#### Model 5

Log pseudolikelihood = -63249.383

|            | Coef.     | Std. Err. | z     | P>z   | [95% Conf. Interval] |           |
|------------|-----------|-----------|-------|-------|----------------------|-----------|
| time       | .0211983  | .0069723  | 3.04  | 0.002 | .0075329             | .0348637  |
| age        | .0152703  | .0032413  | 4.71  | 0.000 | .0089175             | .0216231  |
| female     | .3892161  | .0551855  | 7.05  | 0.000 | .2810545             | .4973777  |
| obese      | .5231674  | .0246971  | 21.18 | 0.000 | .474762              | .5715729  |
| _cons      | -1.168986 | .2117604  | -5.52 | 0.000 | -1.584029            | -.7539432 |
| country    |           |           |       |       |                      |           |
| var(time)  | .0004457  | .0001469  |       |       | .0002337             | .0008503  |
| var(_cons) | .05397    | .0200321  |       |       | .0260742             | .1117104  |

#### Model 6

Log pseudolikelihood = -61614.669

|            | Coef.     | Std. Err. | z     | P>z   | [95% Conf. Interval] |           |
|------------|-----------|-----------|-------|-------|----------------------|-----------|
| painbother |           |           |       |       |                      |           |
| time       | .02285    | .0066137  | 3.45  | 0.001 | .0098874             | .0358127  |
| age        | .0121745  | .0028757  | 4.23  | 0.000 | .0065382             | .0178107  |
| female     | .2879242  | .0456246  | 6.31  | 0.000 | .1985016             | .3773467  |
| depressed  | .7786881  | .0483944  | 16.09 | 0.000 | .6838368             | .8735394  |
| _cons      | -1.013596 | .1967874  | -5.15 | 0.000 | -1.399292            | -.6278995 |
| country    |           |           |       |       |                      |           |
| var(time)  | .0004015  | .0001366  |       |       | .0002062             | .000782   |
| var(_cons) | .0489422  | .0204761  |       |       | .0215558             | .1111229  |

Model 7 (full model)

Log pseudolikelihood = -55275.326

|            | Coef.     | Std. Err. | z     | P>z   | [95% Conf. Interval] |           |
|------------|-----------|-----------|-------|-------|----------------------|-----------|
| time       | .0216579  | .007748   | 2.80  | 0.005 | .006472              | .0368438  |
| age        | -.000188  | .002767   | -0.07 | 0.946 | -.0056112            | .0052351  |
| female     | .1663927  | .0362295  | 4.59  | 0.000 | .0953842             | .2374013  |
| married    | .0357286  | .0219599  | 1.63  | 0.104 | -.0073121            | .0787693  |
| isced2     | -.0572574 | .0379617  | -1.51 | 0.131 | -.1316611            | .0171462  |
| isced3     | -.2194435 | .0297861  | -7.37 | 0.000 | -.2778231            | -.1610638 |
| arthritis  | 2.017569  | .0657861  | 30.67 | 0.000 | 1.888631             | 2.146507  |
| heartdis   | .2564644  | .0222864  | 11.51 | 0.000 | .2127838             | .3001449  |
| diabetes   | .1425095  | .0401338  | 3.55  | 0.000 | .0638487             | .2211702  |
| ld         | .2807371  | .03217    | 8.73  | 0.000 | .217685              | .3437891  |
| cancer     | -.012816  | .0316196  | -0.41 | 0.685 | -.0747893            | .0491573  |
| stroke     | .0751254  | .0462069  | 1.63  | 0.104 | -.0154385            | .1656893  |
| obese      | .3688532  | .0280267  | 13.16 | 0.000 | .3139219             | .4237845  |
| depressed  | .5821898  | .0390973  | 14.89 | 0.000 | .5055604             | .6588192  |
| _cons      | -.5242927 | .1871165  | -2.80 | 0.005 | -.8910343            | -.1575512 |
| country    |           |           |       |       |                      |           |
| var(time)  | .0005617  | .0001892  |       |       | .0002902             | .0010869  |
| var(_cons) | .0630149  | .0200338  |       |       | .0337931             | .1175054  |

Wave 5 (2013) through Wave 6 (2013)

Model 1

Log pseudolikelihood = -74224.018

|            | Coef      | Std. Err. | z     | P>z   | [95% Conf. Interval] |           |
|------------|-----------|-----------|-------|-------|----------------------|-----------|
| time       | .0360052  | .0164846  | 2.18  | 0.029 | .003696              | .0683144  |
| age        | .0205073  | .0046039  | 4.45  | 0.000 | .0114839             | .0295308  |
| female     | .485485   | .0643397  | 7.55  | 0.000 | .3593814             | .6115886  |
| _cons      | -1.880445 | .2956045  | -6.36 | 0.000 | -2.459819            | -1.301071 |
| country    |           |           |       |       |                      |           |
| var(time)  | .00276    | .0008919  |       |       | .001465              | .0051997  |
| var(_cons) | .1283225  | .0368265  |       |       | .0731176             | .225208   |

Model 2

Log pseudolikelihood = -74207.265

|            | Coef.     | Std. Err. | z     | P>z   | [95% Conf. Interval] |           |
|------------|-----------|-----------|-------|-------|----------------------|-----------|
| Time       | .0358983  | .0165107  | 2.17  | 0.030 | .003538              | .0682586  |
| age        | .019912   | .004738   | 4.20  | 0.000 | .0106258             | .0291983  |
| female     | .471905   | .065823   | 7.17  | 0.000 | .3428942             | .6009157  |
| married    | -.0766591 | .0269228  | -2.85 | 0.004 | -.1294269            | -.0238913 |
| _cons      | -1.785776 | .313321   | -5.70 | 0.000 | -2.399874            | -1.171678 |
| country    |           |           |       |       |                      |           |
| var(time)  | .0027737  | .0009059  |       |       | .0014624             | .005261   |
| var(_cons) | .1287483  | .0369038  |       |       | .0734103             | .2258012  |

### Model 3

Log pseudolikelihood = -73676.686

|            | Coef.     | Std. Err. | z      | P>z   | [95% Conf. Interval] |           |
|------------|-----------|-----------|--------|-------|----------------------|-----------|
| time       | .0415876  | .0167206  | 2.49   | 0.013 | .0088158             | .0743593  |
| age        | .0161075  | .0046021  | 3.50   | 0.000 | .0070875             | .0251276  |
| female     | .4661278  | .0662426  | 7.04   | 0.000 | .3362947             | .5959609  |
| isced2     | -.2789305 | .0320963  | -8.69  | 0.000 | -.3418381            | -.2160229 |
| isced3     | -.5651108 | .0417841  | -13.52 | 0.000 | -.647006             | -.4832155 |
| _cons      | -1.325192 | .3032473  | -4.37  | 0.000 | -1.919546            | -.7308383 |
| country    |           |           |        |       |                      |           |
| var(time)  | .0028572  | .0009133  |        |       | .0015271             | .0053459  |
| var(_cons) | .1008538  | .0325963  |        |       | .053528              | .1900219  |

### Model 4

Log pseudolikelihood = -66444.516

|            | Coef.     | Std. Err. | z     | P>z   | [95% Conf. Interval] |           |
|------------|-----------|-----------|-------|-------|----------------------|-----------|
| Time       | .0560341  | .0196069  | 2.86  | 0.004 | .0176053             | .0944628  |
| age        | .0048665  | .004293   | 1.13  | 0.257 | -.0035476            | .0132806  |
| female     | .3663296  | .0622473  | 5.89  | 0.000 | .2443272             | .4883321  |
| arthritis  | 1.810716  | .0410926  | 44.06 | 0.000 | 1.730176             | 1.891256  |
| heartdis   | .4493338  | .0222865  | 20.16 | 0.000 | .4056531             | .4930146  |
| diabetes   | .448164   | .0569267  | 7.87  | 0.000 | .3365897             | .5597382  |
| ld         | .5183287  | .0396959  | 13.06 | 0.000 | .4405261             | .5961312  |
| cancer     | .3637497  | .0598113  | 6.08  | 0.000 | .2465217             | .4809778  |
| stroke     | .4372604  | .0289517  | 15.10 | 0.000 | .380516              | .4940048  |
| _cons      | -1.373522 | .2631564  | -5.22 | 0.000 | -1.889299            | -.8577445 |
| country    |           |           |       |       |                      |           |
| var(time)  | .0037839  | .002066   |       |       | .0012977             | .0110332  |
| var(_cons) | .1555868  | .0418163  |       |       | .0918755             | .2634789  |

### Model 5

Log pseudolikelihood = -73353.957

|            | Coef.     | Std. Err. | z     | P>z   | [95% Conf. Interval] |           |
|------------|-----------|-----------|-------|-------|----------------------|-----------|
| Time       | .0336636  | .0162052  | 2.08  | 0.038 | .001902              | .0654252  |
| age        | .021479   | .0045537  | 4.72  | 0.000 | .012554              | .030404   |
| female     | .4893258  | .0665787  | 7.35  | 0.000 | .3588339             | .6198177  |
| obese      | .5791114  | .0381733  | 15.17 | 0.000 | .5042931             | .6539297  |
| _cons      | -2.069645 | .293737   | -7.05 | 0.000 | -2.645359            | -1.493931 |
| country    |           |           |       |       |                      |           |
| var(time)  | .002595   | .0007527  |       |       | .0014697             | .004582   |
| var(_cons) | .121981   | .0349838  |       |       | .0695296             | .2140002  |

Model 6

Log pseudolikelihood = -68780.28

|            | Coef.     | Std. Err. | z     | P>z   | [95% Conf. Interval] |           |
|------------|-----------|-----------|-------|-------|----------------------|-----------|
| time       | .0396216  | .0184852  | 2.14  | 0.032 | .0033913             | .075852   |
| age        | .0169656  | .0039594  | 4.28  | 0.000 | .0092053             | .0247258  |
| female     | .3687557  | .0571129  | 6.46  | 0.000 | .2568164             | .480695   |
| depressed  | 1.089959  | .0462737  | 23.55 | 0.000 | .9992643             | 1.180654  |
| _cons      | -1.877928 | .254142   | -7.39 | 0.000 | -2.376037            | -1.379818 |
| country    |           |           |       |       |                      |           |
| var(time)  | .0035487  | .0012351  |       |       | .001794              | .0070197  |
| var(_cons) | .1002997  | .0302263  |       |       | .0555625             | .1810581  |

Model 7 (full model)

Log pseudolikelihood = -61676.585

|            | Coef.     | Std. Err. | z      | P>z   | [95% Conf. Interval] |           |
|------------|-----------|-----------|--------|-------|----------------------|-----------|
| Time       | .0591023  | .0212274  | 2.78   | 0.005 | .0174973             | .1007072  |
| age        | .0010001  | .0039998  | 0.25   | 0.803 | -.0068393            | .0088395  |
| female     | .251068   | .0592695  | 4.24   | 0.000 | .1349018             | .3672341  |
| married    | .0046632  | .0231886  | 0.20   | 0.841 | -.0407855            | .050112   |
| isced2     | -.1894441 | .020006   | -9.47  | 0.000 | -.2286551            | -.1502331 |
| isced3     | -.3906461 | .0325609  | -12.00 | 0.000 | -.4544643            | -.3268278 |
| arthritis  | 1.754168  | .0422933  | 41.48  | 0.000 | 1.671275             | 1.837061  |
| heartdis   | .3285412  | .024826   | 13.23  | 0.000 | .279883              | .3771993  |
| diabetes   | .2994948  | .0534361  | 5.60   | 0.000 | .194762              | .4042275  |
| ld         | .3714717  | .0387381  | 9.59   | 0.000 | .2955465             | .447397   |
| cancer     | .2762729  | .0535097  | 5.16   | 0.000 | .1713958             | .3811501  |
| stroke     | .2811323  | .0264908  | 10.61  | 0.000 | .2292112             | .3330533  |
| obese      | .3836945  | .0309836  | 12.38  | 0.000 | .3229677             | .4444213  |
| depressed  | .9151692  | .0442367  | 20.69  | 0.000 | .8284668             | 1.001872  |
| _cons      | -1.150471 | .2573378  | -4.47  | 0.000 | -1.654844            | -.6460986 |
| country    |           |           |        |       |                      |           |
| var(time)  | .0045614  | .0018983  |        |       | .0020177             | .0103119  |
| var(_cons) | .110431   | .0318923  |        |       | .0626997             | .1944987  |

Supplementary Table 3: Complete results for country-by-country logistic regressions, base and full model

Waves 1 to 4

Base models

Austria

|        | Coef.  | Std. Err. | z      | P>z   | [95%<br>Conf. | Interval] |
|--------|--------|-----------|--------|-------|---------------|-----------|
| time   | 0.006  | 0.008     | 0.730  | 0.465 | -0.010        | 0.023     |
| Age    | 0.013  | 0.003     | 5.150  | 0.000 | 0.008         | 0.019     |
| Female | 0.223  | 0.051     | 4.400  | 0.000 | 0.123         | 0.322     |
| _cons  | -0.884 | 0.177     | -4.990 | 0.000 | -1.232        | -0.537    |

Germany

|        | Coef.  | Std. Err. | z      | P>z   | [95%<br>Conf. | Interval] |
|--------|--------|-----------|--------|-------|---------------|-----------|
| time   | 0.060  | 0.010     | 5.770  | 0.000 | 0.039         | 0.080     |
| Age    | 0.016  | 0.003     | 5.370  | 0.000 | 0.010         | 0.021     |
| Female | 0.222  | 0.053     | 4.150  | 0.000 | 0.117         | 0.326     |
| _cons  | -0.820 | 0.197     | -4.160 | 0.000 | -1.207        | -0.434    |

Sweden

|        | Coef.  | Std. Err. | z      | P>z   | [95%<br>Conf. | Interval] |
|--------|--------|-----------|--------|-------|---------------|-----------|
| time   | 0.009  | 0.010     | 0.840  | 0.400 | -0.012        | 0.029     |
| Age    | 0.003  | 0.003     | 1.210  | 0.225 | -0.002        | 0.009     |
| Female | 0.400  | 0.053     | 7.490  | 0.000 | 0.295         | 0.504     |
| _cons  | -0.343 | 0.193     | -1.780 | 0.075 | -0.720        | 0.035     |

Netherlands

|        | Coef.  | Std. Err. | z      | P>z   | [95%<br>Conf. | Interval] |
|--------|--------|-----------|--------|-------|---------------|-----------|
| time   | 0.019  | 0.009     | 2.170  | 0.030 | 0.002         | 0.036     |
| Age    | 0.004  | 0.003     | 1.430  | 0.153 | -0.001        | 0.009     |
| female | 0.419  | 0.050     | 8.440  | 0.000 | 0.322         | 0.516     |
| _cons  | -0.813 | 0.174     | -4.660 | 0.000 | -1.155        | -0.472    |

Spain

|        | Coef.  | Std. Err. | z       | P>z   | [95%<br>Conf. | Interval] |
|--------|--------|-----------|---------|-------|---------------|-----------|
| time   | 0.016  | 0.009     | 1.830   | 0.068 | -0.001        | 0.034     |
| age    | 0.029  | 0.003     | 11.210  | 0.000 | 0.024         | 0.034     |
| female | 0.858  | 0.053     | 16.160  | 0.000 | 0.754         | 0.962     |
| _cons  | -2.235 | 0.182     | -12.320 | 0.000 | -2.591        | -1.880    |

# Italy

|        | Coef.  | Std. Err. | z       | P>z   | [95%<br>Conf. | Interval] |
|--------|--------|-----------|---------|-------|---------------|-----------|
| time   | -0.004 | 0.009     | -0.450  | 0.650 | -0.022        | 0.014     |
| age    | 0.033  | 0.003     | 11.050  | 0.000 | 0.027         | 0.039     |
| female | 0.625  | 0.053     | 11.910  | 0.000 | 0.522         | 0.728     |
| _cons  | -2.329 | 0.206     | -11.320 | 0.000 | -2.732        | -1.926    |

# France

|        | Coef.  | Std. Err. | z      | P>z   | [95%<br>Conf. | Interval] |
|--------|--------|-----------|--------|-------|---------------|-----------|
| time   | 0.053  | 0.007     | 7.450  | 0.000 | 0.039         | 0.067     |
| age    | 0.010  | 0.002     | 4.830  | 0.000 | 0.006         | 0.014     |
| female | 0.218  | 0.043     | 5.110  | 0.000 | 0.135         | 0.302     |
| _cons  | -0.460 | 0.139     | -3.300 | 0.001 | -0.732        | -0.187    |

# 18. Denmark

|        | Coef.  | Std. Err. | z      | P>z   | [95%<br>Conf. | Interval] |
|--------|--------|-----------|--------|-------|---------------|-----------|
| time   | 0.012  | 0.009     | 1.340  | 0.180 | -0.006        | 0.031     |
| age    | 0.001  | 0.002     | 0.540  | 0.592 | -0.003        | 0.006     |
| female | 0.205  | 0.051     | 4.000  | 0.000 | 0.105         | 0.306     |
| _cons  | -0.279 | 0.162     | -1.720 | 0.086 | -0.597        | 0.039     |

# Switzerland

|        | Coef.  | Std. Err. | z      | P>z   | [95%<br>Conf. | Interval] |
|--------|--------|-----------|--------|-------|---------------|-----------|
| time   | 0.028  | 0.010     | 2.870  | 0.004 | 0.009         | 0.047     |
| age    | 0.015  | 0.003     | 5.510  | 0.000 | 0.009         | 0.020     |
| female | 0.254  | 0.054     | 4.710  | 0.000 | 0.148         | 0.360     |
| _cons  | -1.364 | 0.180     | -7.600 | 0.000 | -1.716        | -1.012    |

# Belgium

|        | Coef.  | Std. Err. | z      | P>z   | [95%<br>Conf. | Interval] |
|--------|--------|-----------|--------|-------|---------------|-----------|
| time   | 0.059  | 0.008     | 7.550  | 0.000 | 0.044         | 0.074     |
| age    | 0.006  | 0.002     | 3.030  | 0.002 | 0.002         | 0.010     |
| female | 0.406  | 0.041     | 9.890  | 0.000 | 0.325         | 0.486     |
| _cons  | -0.406 | 0.139     | -2.930 | 0.003 | -0.678        | -0.134    |

# Czech Republic

|        | Coef.  | Std. Err. | z      | P>z   | [95%<br>Conf. | Interval] |
|--------|--------|-----------|--------|-------|---------------|-----------|
| time   | -0.004 | 0.016     | -0.250 | 0.803 | -0.035        | 0.027     |
| age    | 0.031  | 0.004     | 8.150  | 0.000 | 0.024         | 0.039     |
| female | 0.377  | 0.066     | 5.700  | 0.000 | 0.247         | 0.506     |
| _cons  | -1.693 | 0.251     | -6.740 | 0.000 | -2.186        | -1.201    |

# Poland

|        | Coef.  | Std. Err. | z      | P>z   | [95%<br>Conf. | Interval] |
|--------|--------|-----------|--------|-------|---------------|-----------|
| time   | -0.006 | 0.015     | -0.390 | 0.700 | -0.034        | 0.023     |
| age    | 0.028  | 0.004     | 7.250  | 0.000 | 0.020         | 0.036     |
| female | 0.384  | 0.072     | 5.320  | 0.000 | 0.242         | 0.526     |
| _cons  | -1.632 | 0.256     | -6.370 | 0.000 | -2.134        | -1.130    |

# Full models

## Austria

|           | Coef.  | Std. Err. | z      | P>z   | [95%<br>Conf. | Interval] |
|-----------|--------|-----------|--------|-------|---------------|-----------|
| time      | -0.001 | 0.009     | -0.100 | 0.917 | -0.019        | 0.017     |
| age       | 0.004  | 0.003     | 1.440  | 0.150 | -0.002        | 0.010     |
| female    | 0.082  | 0.058     | 1.410  | 0.159 | -0.032        | 0.195     |
| married   | 0.114  | 0.058     | 1.960  | 0.050 | 0.000         | 0.229     |
| education | -0.075 | 0.021     | -3.520 | 0.000 | -0.116        | -0.033    |
| arthritis | 2.125  | 0.110     | 19.350 | 0.000 | 1.910         | 2.341     |
| heartdis  | 0.265  | 0.080     | 3.320  | 0.001 | 0.108         | 0.421     |
| diabetes  | 0.249  | 0.089     | 2.800  | 0.005 | 0.075         | 0.423     |
| ld        | 0.334  | 0.133     | 2.520  | 0.012 | 0.074         | 0.593     |
| cancer    | -0.082 | 0.124     | -0.660 | 0.511 | -0.325        | 0.162     |
| stroke    | -0.018 | 0.133     | -0.140 | 0.891 | -0.278        | 0.242     |
| obese     | 0.355  | 0.070     | 5.100  | 0.000 | 0.219         | 0.492     |
| depressed | 0.553  | 0.072     | 7.700  | 0.000 | 0.412         | 0.694     |
| _cons     | -0.510 | 0.231     | -2.200 | 0.027 | -0.963        | -0.057    |

# Germany

|           | Coef.  | Std. Err. | z      | P>z   | [95%<br>Conf. | Interval] |
|-----------|--------|-----------|--------|-------|---------------|-----------|
| time      | 0.057  | 0.011     | 5.070  | 0.000 | 0.035         | 0.079     |
| age       | 0.004  | 0.003     | 1.080  | 0.282 | -0.003        | 0.010     |
| female    | 0.073  | 0.059     | 1.220  | 0.221 | -0.044        | 0.189     |
| married   | 0.030  | 0.066     | 0.460  | 0.648 | -0.099        | 0.160     |
| education | -0.121 | 0.027     | -4.400 | 0.000 | -0.175        | -0.067    |
| arthritis | 1.942  | 0.128     | 15.220 | 0.000 | 1.692         | 2.192     |
| heartdis  | 0.222  | 0.086     | 2.570  | 0.010 | 0.053         | 0.391     |
| diabetes  | 0.172  | 0.095     | 1.820  | 0.069 | -0.014        | 0.358     |
| ld        | 0.224  | 0.130     | 1.730  | 0.084 | -0.030        | 0.478     |
| cancer    | 0.171  | 0.123     | 1.390  | 0.165 | -0.070        | 0.412     |
| stroke    | 0.270  | 0.167     | 1.620  | 0.105 | -0.057        | 0.597     |
| obese     | 0.506  | 0.079     | 6.390  | 0.000 | 0.351         | 0.662     |
| depressed | 0.656  | 0.081     | 8.140  | 0.000 | 0.498         | 0.813     |
| _cons     | -0.048 | 0.266     | -0.180 | 0.857 | -0.568        | 0.473     |

# Sweden

|           | Coef.  | Std. Err. | z      | P>z   | [95%<br>Conf. | Interval] |
|-----------|--------|-----------|--------|-------|---------------|-----------|
| time      | 0.016  | 0.011     | 1.430  | 0.153 | -0.006        | 0.038     |
| age       | -0.009 | 0.003     | -2.640 | 0.008 | -0.015        | -0.002    |
| female    | 0.284  | 0.058     | 4.850  | 0.000 | 0.169         | 0.398     |
| married   | 0.130  | 0.067     | 1.940  | 0.053 | -0.002        | 0.262     |
| education | -0.118 | 0.019     | -6.200 | 0.000 | -0.155        | -0.080    |
| arthritis | 1.841  | 0.117     | 15.750 | 0.000 | 1.612         | 2.070     |
| heartdis  | 0.285  | 0.076     | 3.760  | 0.000 | 0.137         | 0.433     |
| diabetes  | -0.050 | 0.095     | -0.530 | 0.596 | -0.236        | 0.135     |
| ld        | 0.276  | 0.155     | 1.780  | 0.075 | -0.028        | 0.579     |
| cancer    | -0.089 | 0.115     | -0.770 | 0.439 | -0.314        | 0.136     |
| stroke    | -0.207 | 0.141     | -1.460 | 0.144 | -0.484        | 0.070     |
| obese     | 0.452  | 0.084     | 5.360  | 0.000 | 0.287         | 0.618     |
| depressed | 0.559  | 0.078     | 7.190  | 0.000 | 0.406         | 0.711     |
| _cons     | 0.403  | 0.272     | 1.480  | 0.138 | -0.130        | 0.937     |

# Netherlands

|           | Coef.  | Std. Err. | z      | P>z   | [95%<br>Conf. | Interval] |
|-----------|--------|-----------|--------|-------|---------------|-----------|
| time      | 0.020  | 0.009     | 2.110  | 0.035 | 0.001         | 0.039     |
| age       | -0.004 | 0.003     | -1.220 | 0.223 | -0.010        | 0.002     |
| female    | 0.237  | 0.055     | 4.330  | 0.000 | 0.130         | 0.344     |
| married   | -0.056 | 0.066     | -0.850 | 0.395 | -0.185        | 0.073     |
| education | -0.018 | 0.020     | -0.880 | 0.377 | -0.058        | 0.022     |
| arthritis | 1.956  | 0.108     | 18.130 | 0.000 | 1.744         | 2.167     |
| heartdis  | 0.307  | 0.079     | 3.870  | 0.000 | 0.152         | 0.463     |
| diabetes  | 0.023  | 0.093     | 0.250  | 0.803 | -0.160        | 0.206     |
| ld        | 0.266  | 0.107     | 2.480  | 0.013 | 0.056         | 0.476     |
| cancer    | -0.044 | 0.119     | -0.370 | 0.710 | -0.278        | 0.189     |
| stroke    | 0.032  | 0.152     | 0.210  | 0.832 | -0.265        | 0.330     |
| obese     | 0.529  | 0.077     | 6.900  | 0.000 | 0.379         | 0.680     |
| depressed | 0.532  | 0.070     | 7.600  | 0.000 | 0.395         | 0.669     |
| _cons     | -0.571 | 0.245     | -2.330 | 0.020 | -1.051        | -0.091    |

# Spain

|           | Coef.  | Std. Err. | z      | P>z   | [95%<br>Conf. | Interval] |
|-----------|--------|-----------|--------|-------|---------------|-----------|
| time      | 0.012  | 0.010     | 1.200  | 0.231 | -0.008        | 0.033     |
| age       | 0.003  | 0.003     | 0.860  | 0.388 | -0.004        | 0.009     |
| female    | 0.439  | 0.064     | 6.830  | 0.000 | 0.313         | 0.565     |
| married   | 0.095  | 0.077     | 1.240  | 0.217 | -0.055        | 0.245     |
| education | -0.082 | 0.025     | -3.300 | 0.001 | -0.131        | -0.033    |
| arthritis | 2.185  | 0.081     | 26.840 | 0.000 | 2.025         | 2.344     |
| heartdis  | 0.346  | 0.096     | 3.600  | 0.000 | 0.158         | 0.535     |
| diabetes  | 0.264  | 0.084     | 3.130  | 0.002 | 0.099         | 0.429     |
| ld        | 0.266  | 0.139     | 1.910  | 0.056 | -0.007        | 0.538     |
| cancer    | 0.057  | 0.178     | 0.320  | 0.749 | -0.291        | 0.405     |
| stroke    | 0.309  | 0.203     | 1.520  | 0.129 | -0.090        | 0.707     |
| obese     | 0.188  | 0.077     | 2.450  | 0.014 | 0.037         | 0.339     |
| depressed | 0.777  | 0.070     | 11.130 | 0.000 | 0.640         | 0.914     |
| _cons     | -1.095 | 0.261     | -4.200 | 0.000 | -1.606        | -0.583    |

# Italy

|           | Coef.  | Std. Err. | z      | P>z   | [95%<br>Conf. | Interval] |
|-----------|--------|-----------|--------|-------|---------------|-----------|
| time      | -0.003 | 0.011     | -0.290 | 0.772 | -0.024        | 0.018     |
| age       | 0.005  | 0.004     | 1.270  | 0.204 | -0.003        | 0.012     |
| female    | 0.194  | 0.062     | 3.140  | 0.002 | 0.073         | 0.315     |
| married   | -0.044 | 0.076     | -0.580 | 0.563 | -0.194        | 0.105     |
| education | -0.085 | 0.026     | -3.200 | 0.001 | -0.136        | -0.033    |
| arthritis | 2.304  | 0.080     | 28.780 | 0.000 | 2.147         | 2.461     |
| heartdis  | 0.143  | 0.097     | 1.470  | 0.141 | -0.047        | 0.333     |
| diabetes  | 0.003  | 0.096     | 0.030  | 0.973 | -0.185        | 0.191     |
| ld        | 0.258  | 0.130     | 1.990  | 0.047 | 0.003         | 0.513     |
| cancer    | -0.009 | 0.155     | -0.060 | 0.954 | -0.312        | 0.294     |
| stroke    | 0.352  | 0.189     | 1.860  | 0.062 | -0.018        | 0.721     |
| obese     | 0.319  | 0.079     | 4.050  | 0.000 | 0.164         | 0.473     |
| depressed | 0.629  | 0.069     | 9.070  | 0.000 | 0.493         | 0.764     |
| _cons     | -0.923 | 0.287     | -3.210 | 0.001 | -1.486        | -0.360    |

# France

|           | Coef.  | Std. Err. | z      | P>z   | [95%<br>Conf. | Interval] |
|-----------|--------|-----------|--------|-------|---------------|-----------|
| time      | 0.065  | 0.008     | 8.210  | 0.000 | 0.049         | 0.080     |
| age       | -0.010 | 0.003     | -3.850 | 0.000 | -0.015        | -0.005    |
| female    | -0.004 | 0.049     | -0.080 | 0.936 | -0.100        | 0.093     |
| married   | -0.002 | 0.051     | -0.040 | 0.972 | -0.102        | 0.099     |
| education | -0.029 | 0.014     | -2.070 | 0.038 | -0.057        | -0.002    |
| arthritis | 1.886  | 0.061     | 30.770 | 0.000 | 1.766         | 2.007     |
| heartdis  | 0.263  | 0.069     | 3.830  | 0.000 | 0.128         | 0.398     |
| diabetes  | 0.022  | 0.077     | 0.290  | 0.771 | -0.128        | 0.173     |
| ld        | 0.198  | 0.104     | 1.900  | 0.057 | -0.006        | 0.402     |
| cancer    | 0.042  | 0.101     | 0.420  | 0.677 | -0.155        | 0.239     |
| stroke    | 0.062  | 0.136     | 0.460  | 0.646 | -0.204        | 0.329     |
| obese     | 0.294  | 0.065     | 4.560  | 0.000 | 0.168         | 0.421     |
| depressed | 0.410  | 0.052     | 7.900  | 0.000 | 0.308         | 0.511     |
| _cons     | 0.328  | 0.190     | 1.730  | 0.084 | -0.044        | 0.700     |

# Denmark

|           | Coef.  | Std. Err. | z      | P>z   | [95%<br>Conf. | Interval] |
|-----------|--------|-----------|--------|-------|---------------|-----------|
| time      | 0.023  | 0.010     | 2.170  | 0.030 | 0.002         | 0.043     |
| age       | -0.014 | 0.003     | -4.600 | 0.000 | -0.020        | -0.008    |
| female    | 0.010  | 0.059     | 0.170  | 0.868 | -0.105        | 0.124     |
| married   | 0.121  | 0.063     | 1.930  | 0.054 | -0.002        | 0.244     |
| education | -0.070 | 0.022     | -3.210 | 0.001 | -0.112        | -0.027    |
| arthritis | 1.926  | 0.072     | 26.650 | 0.000 | 1.784         | 2.068     |
| heartdis  | 0.409  | 0.095     | 4.290  | 0.000 | 0.222         | 0.596     |
| diabetes  | -0.085 | 0.111     | -0.770 | 0.443 | -0.303        | 0.132     |
| ld        | 0.488  | 0.117     | 4.160  | 0.000 | 0.258         | 0.717     |
| cancer    | 0.067  | 0.130     | 0.520  | 0.604 | -0.187        | 0.322     |
| stroke    | 0.052  | 0.149     | 0.350  | 0.729 | -0.241        | 0.344     |
| obese     | 0.401  | 0.086     | 4.680  | 0.000 | 0.233         | 0.568     |
| depressed | 0.638  | 0.080     | 7.930  | 0.000 | 0.480         | 0.796     |
| _cons     | 0.266  | 0.240     | 1.110  | 0.269 | -0.205        | 0.737     |

# Switzerland

|           | Coef.  | Std. Err. | z      | P>z   | [95%<br>Conf. | Interval] |
|-----------|--------|-----------|--------|-------|---------------|-----------|
| time      | 0.007  | 0.011     | 0.640  | 0.523 | -0.014        | 0.027     |
| age       | 0.005  | 0.003     | 1.680  | 0.092 | -0.001        | 0.011     |
| female    | 0.075  | 0.060     | 1.260  | 0.209 | -0.042        | 0.193     |
| married   | -0.103 | 0.063     | -1.640 | 0.102 | -0.226        | 0.020     |
| education | -0.054 | 0.026     | -2.060 | 0.040 | -0.106        | -0.003    |
| arthritis | 1.706  | 0.089     | 19.260 | 0.000 | 1.533         | 1.880     |
| heartdis  | 0.278  | 0.106     | 2.620  | 0.009 | 0.070         | 0.486     |
| diabetes  | 0.242  | 0.119     | 2.040  | 0.041 | 0.009         | 0.475     |
| ld        | 0.283  | 0.162     | 1.750  | 0.080 | -0.034        | 0.600     |
| cancer    | 0.100  | 0.124     | 0.810  | 0.419 | -0.143        | 0.344     |
| stroke    | -0.158 | 0.195     | -0.810 | 0.419 | -0.540        | 0.225     |
| obese     | 0.180  | 0.087     | 2.070  | 0.038 | 0.010         | 0.351     |
| depressed | 0.409  | 0.078     | 5.260  | 0.000 | 0.257         | 0.562     |
| _cons     | -0.802 | 0.244     | -3.290 | 0.001 | -1.280        | -0.325    |

# Belgium

|           | Coef.  | Std. Err. | z      | P>z   | [95%<br>Conf. | Interval] |
|-----------|--------|-----------|--------|-------|---------------|-----------|
| time      | 0.061  | 0.009     | 7.030  | 0.000 | 0.044         | 0.078     |
| age       | -0.010 | 0.002     | -4.070 | 0.000 | -0.015        | -0.005    |
| female    | 0.160  | 0.046     | 3.450  | 0.001 | 0.069         | 0.251     |
| married   | 0.021  | 0.051     | 0.410  | 0.685 | -0.080        | 0.121     |
| education | -0.073 | 0.016     | -4.670 | 0.000 | -0.104        | -0.042    |
| arthritis | 1.988  | 0.066     | 29.980 | 0.000 | 1.858         | 2.118     |
| heartdis  | 0.180  | 0.067     | 2.680  | 0.007 | 0.048         | 0.311     |
| diabetes  | 0.085  | 0.079     | 1.080  | 0.282 | -0.070        | 0.240     |
| ld        | 0.130  | 0.102     | 1.270  | 0.204 | -0.070        | 0.330     |
| cancer    | -0.047 | 0.095     | -0.490 | 0.626 | -0.234        | 0.141     |
| stroke    | 0.134  | 0.126     | 1.060  | 0.289 | -0.113        | 0.380     |
| obese     | 0.349  | 0.058     | 5.970  | 0.000 | 0.235         | 0.463     |
| depressed | 0.576  | 0.054     | 10.670 | 0.000 | 0.471         | 0.682     |
| _cons     | 0.339  | 0.191     | 1.780  | 0.076 | -0.035        | 0.713     |

# Czech

|           | Coef.  | Std. Err. | z      | P>z   | [95%<br>Conf. | Interval] |
|-----------|--------|-----------|--------|-------|---------------|-----------|
| time      | -0.018 | 0.017     | -1.080 | 0.282 | -0.051        | 0.015     |
| age       | 0.022  | 0.004     | 5.120  | 0.000 | 0.014         | 0.031     |
| female    | 0.259  | 0.071     | 3.660  | 0.000 | 0.121         | 0.398     |
| married   | 0.063  | 0.079     | 0.800  | 0.422 | -0.091        | 0.218     |
| education | -0.112 | 0.030     | -3.730 | 0.000 | -0.170        | -0.053    |
| arthritis | 2.009  | 0.130     | 15.460 | 0.000 | 1.755         | 2.264     |
| heartdis  | 0.135  | 0.094     | 1.450  | 0.148 | -0.048        | 0.319     |
| diabetes  | 0.308  | 0.101     | 3.070  | 0.002 | 0.111         | 0.506     |
| ld        | 0.510  | 0.162     | 3.150  | 0.002 | 0.193         | 0.828     |
| cancer    | -0.227 | 0.160     | -1.420 | 0.155 | -0.540        | 0.086     |
| stroke    | 0.060  | 0.172     | 0.350  | 0.728 | -0.277        | 0.396     |
| obese     | 0.405  | 0.082     | 4.970  | 0.000 | 0.245         | 0.565     |
| depressed | 0.503  | 0.106     | 4.770  | 0.000 | 0.297         | 0.710     |
| _cons     | -1.270 | 0.302     | -4.210 | 0.000 | -1.862        | -0.678    |

Poland

|           | Coef.  | Std. Err. | z      | P>z   | [95%<br>Conf. | Interval] |
|-----------|--------|-----------|--------|-------|---------------|-----------|
| time      | 0.022  | 0.017     | 1.280  | 0.200 | -0.012        | 0.057     |
| age       | 0.008  | 0.005     | 1.510  | 0.130 | -0.002        | 0.017     |
| female    | 0.111  | 0.088     | 1.260  | 0.207 | -0.062        | 0.284     |
| married   | 0.109  | 0.095     | 1.150  | 0.252 | -0.078        | 0.297     |
| education | -0.044 | 0.035     | -1.270 | 0.203 | -0.113        | 0.024     |
| arthritis | 2.381  | 0.119     | 20.020 | 0.000 | 2.148         | 2.614     |
| heartdis  | 0.350  | 0.101     | 3.450  | 0.001 | 0.151         | 0.548     |
| diabetes  | 0.203  | 0.135     | 1.500  | 0.133 | -0.062        | 0.467     |
| ld        | 0.329  | 0.202     | 1.630  | 0.102 | -0.066        | 0.725     |
| cancer    | 0.412  | 0.284     | 1.450  | 0.146 | -0.144        | 0.969     |
| stroke    | 0.315  | 0.220     | 1.430  | 0.152 | -0.116        | 0.745     |
| obese     | 0.417  | 0.100     | 4.160  | 0.000 | 0.221         | 0.613     |
| depressed | 0.667  | 0.090     | 7.420  | 0.000 | 0.491         | 0.844     |
| _cons     | -1.237 | 0.381     | -3.250 | 0.001 | -1.983        | -0.491    |

Waves 5 and 6

Base models

Austria

|        | Coef.  | Std. Err. | z       | P>z   | [95%<br>Conf. | Interval] |
|--------|--------|-----------|---------|-------|---------------|-----------|
| time   | 0.044  | 0.030     | 1.460   | 0.145 | -0.015        | 0.103     |
| age    | 0.024  | 0.003     | 8.190   | 0.000 | 0.018         | 0.030     |
| female | 0.324  | 0.060     | 5.380   | 0.000 | 0.206         | 0.443     |
| _cons  | -2.382 | 0.217     | -10.990 | 0.000 | -2.807        | -1.957    |

Germany

|        | Coef.  | Std. Err. | z      | P>z   | [95%<br>Conf. | Interval] |
|--------|--------|-----------|--------|-------|---------------|-----------|
| time   | -0.021 | 0.024     | -0.870 | 0.384 | -0.067        | 0.026     |
| age    | 0.010  | 0.002     | 4.260  | 0.000 | 0.005         | 0.015     |
| female | 0.427  | 0.046     | 9.230  | 0.000 | 0.336         | 0.517     |
| _cons  | -1.356 | 0.164     | -8.290 | 0.000 | -1.676        | -1.035    |

Sweden

|        | Coef.  | Std. Err. | z      | P>z   | [95%<br>Conf. | Interval] |
|--------|--------|-----------|--------|-------|---------------|-----------|
| time   | -0.018 | 0.028     | -0.650 | 0.517 | -0.073        | 0.037     |
| age    | 0.007  | 0.003     | 2.540  | 0.011 | 0.002         | 0.013     |
| female | 0.648  | 0.056     | 11.600 | 0.000 | 0.538         | 0.757     |
| _cons  | -1.358 | 0.209     | -6.480 | 0.000 | -1.769        | -0.948    |

# Spain

|        | Coef.  | Std. Err. | z       | P>z   | [95%<br>Conf. | Interval] |
|--------|--------|-----------|---------|-------|---------------|-----------|
| time   | -0.005 | 0.041     | -0.120  | 0.907 | -0.085        | 0.075     |
| age    | 0.042  | 0.004     | 10.560  | 0.000 | 0.034         | 0.049     |
| female | 0.873  | 0.081     | 10.720  | 0.000 | 0.714         | 1.033     |
| _cons  | -3.220 | 0.296     | -10.890 | 0.000 | -3.799        | -2.640    |

# Italy

|        | Coef.  | Std. Err. | z       | P>z   | [95%<br>Conf. | Interval] |
|--------|--------|-----------|---------|-------|---------------|-----------|
| time   | -0.052 | 0.026     | -1.980  | 0.048 | -0.103        | 0.000     |
| age    | 0.047  | 0.003     | 16.650  | 0.000 | 0.041         | 0.053     |
| female | 0.770  | 0.053     | 14.650  | 0.000 | 0.667         | 0.873     |
| _cons  | -3.446 | 0.201     | -17.160 | 0.000 | -3.840        | -3.053    |

# France

|        | Coef.  | Std. Err. | z      | P>z   | [95%<br>Conf. | Interval] |
|--------|--------|-----------|--------|-------|---------------|-----------|
| time   | -0.023 | 0.026     | -0.900 | 0.370 | -0.073        | 0.027     |
| age    | 0.020  | 0.002     | 8.090  | 0.000 | 0.015         | 0.025     |
| female | 0.395  | 0.051     | 7.690  | 0.000 | 0.295         | 0.496     |
| _cons  | -1.283 | 0.174     | -7.390 | 0.000 | -1.624        | -0.943    |

# Denmark

|        | Coef.  | Std. Err. | z      | P>z   | [95%<br>Conf. | Interval] |
|--------|--------|-----------|--------|-------|---------------|-----------|
| time   | 0.044  | 0.026     | 1.700  | 0.089 | -0.007        | 0.094     |
| age    | 0.001  | 0.003     | 0.510  | 0.610 | -0.004        | 0.006     |
| female | 0.434  | 0.052     | 8.410  | 0.000 | 0.333         | 0.534     |
| _cons  | -1.066 | 0.173     | -6.160 | 0.000 | -1.404        | -0.727    |

# Switzerland

|        | Coef.  | Std. Err. | z       | P>z   | [95%<br>Conf. | Interval] |
|--------|--------|-----------|---------|-------|---------------|-----------|
| time   | 0.059  | 0.033     | 1.830   | 0.067 | -0.004        | 0.123     |
| age    | 0.019  | 0.003     | 5.710   | 0.000 | 0.012         | 0.025     |
| female | 0.417  | 0.066     | 6.310   | 0.000 | 0.287         | 0.546     |
| _cons  | -2.415 | 0.237     | -10.210 | 0.000 | -2.879        | -1.951    |

# Belgium

|        | Coef.  | Std. Err. | z      | P>z   | [95%<br>Conf. | Interval] |
|--------|--------|-----------|--------|-------|---------------|-----------|
| time   | 0.102  | 0.025     | 4.100  | 0.000 | 0.053         | 0.151     |
| age    | 0.001  | 0.002     | 0.580  | 0.564 | -0.003        | 0.006     |
| female | 0.496  | 0.050     | 9.860  | 0.000 | 0.397         | 0.594     |
| _cons  | -0.620 | 0.171     | -3.630 | 0.000 | -0.954        | -0.286    |

# Czech

|        | Coef.  | Std. Err. | z      | P>z   | [95%<br>Conf. | Interval] |
|--------|--------|-----------|--------|-------|---------------|-----------|
| time   | 0.138  | 0.040     | 3.480  | 0.000 | 0.060         | 0.216     |
| age    | 0.027  | 0.005     | 5.700  | 0.000 | 0.018         | 0.036     |
| female | 0.258  | 0.080     | 3.240  | 0.001 | 0.102         | 0.415     |
| _cons  | -1.952 | 0.343     | -5.690 | 0.000 | -2.626        | -1.279    |

# Luxembourg

|        | Coef.  | Std. Err. | z      | P>z   | [95%<br>Conf. | Interval] |
|--------|--------|-----------|--------|-------|---------------|-----------|
| time   | 0.024  | 0.042     | 0.570  | 0.567 | -0.058        | 0.105     |
| age    | 0.005  | 0.004     | 1.260  | 0.208 | -0.003        | 0.014     |
| female | 0.594  | 0.083     | 7.140  | 0.000 | 0.431         | 0.757     |
| _cons  | -0.910 | 0.294     | -3.100 | 0.002 | -1.486        | -0.334    |

# Slovenia

|        | Coef.  | Std. Err. | z       | P>z   | [95%<br>Conf. | Interval] |
|--------|--------|-----------|---------|-------|---------------|-----------|
| time   | 0.056  | 0.030     | 1.890   | 0.059 | -0.002        | 0.115     |
| age    | 0.032  | 0.003     | 10.120  | 0.000 | 0.026         | 0.038     |
| female | 0.491  | 0.059     | 8.320   | 0.000 | 0.375         | 0.606     |
| _cons  | -2.307 | 0.221     | -10.430 | 0.000 | -2.741        | -1.873    |

# Estonia

|        | Coef.  | Std. Err. | z      | P>z   | [95%<br>Conf. | Interval] |
|--------|--------|-----------|--------|-------|---------------|-----------|
| time   | 0.101  | 0.022     | 4.670  | 0.000 | 0.058         | 0.143     |
| age    | 0.017  | 0.002     | 7.860  | 0.000 | 0.013         | 0.021     |
| female | 0.193  | 0.045     | 4.320  | 0.000 | 0.105         | 0.281     |
| _cons  | -1.172 | 0.153     | -7.680 | 0.000 | -1.470        | -0.873    |

Full models  
Austria

|           | Coef.  | Std. Err. | z      | P>z   | [95%<br>Conf. | Interval] |
|-----------|--------|-----------|--------|-------|---------------|-----------|
| time      | 0.000  | 0.034     | 0.000  | 0.997 | -0.067        | 0.067     |
| age       | 0.006  | 0.004     | 1.700  | 0.089 | -0.001        | 0.013     |
| female    | 0.098  | 0.071     | 1.390  | 0.165 | -0.041        | 0.237     |
| married   | -0.074 | 0.069     | -1.070 | 0.287 | -0.209        | 0.062     |
| education | -0.131 | 0.025     | -5.220 | 0.000 | -0.181        | -0.082    |
| arthritis | 1.629  | 0.097     | 16.760 | 0.000 | 1.439         | 1.820     |
| heartdis  | 0.405  | 0.102     | 3.960  | 0.000 | 0.205         | 0.606     |
| diabetes  | 0.396  | 0.098     | 4.040  | 0.000 | 0.204         | 0.589     |
| ld        | 0.443  | 0.142     | 3.120  | 0.002 | 0.165         | 0.721     |
| cancer    | 0.424  | 0.146     | 2.900  | 0.004 | 0.137         | 0.712     |
| stroke    | 0.297  | 0.152     | 1.960  | 0.050 | 0.000         | 0.594     |
| obese     | 0.513  | 0.084     | 6.070  | 0.000 | 0.348         | 0.679     |
| depressed | 1.069  | 0.083     | 12.840 | 0.000 | 0.906         | 1.233     |
| _cons     | -1.306 | 0.290     | -4.510 | 0.000 | -1.874        | -0.738    |

Germany

|           | Coef.  | Std. Err. | z      | P>z   | [95%<br>Conf. | Interval] |
|-----------|--------|-----------|--------|-------|---------------|-----------|
| time      | -0.031 | 0.027     | -1.150 | 0.252 | -0.084        | 0.022     |
| age       | -0.006 | 0.003     | -2.140 | 0.032 | -0.012        | -0.001    |
| female    | 0.155  | 0.055     | 2.810  | 0.005 | 0.047         | 0.262     |
| married   | 0.005  | 0.058     | 0.090  | 0.928 | -0.109        | 0.119     |
| education | -0.151 | 0.025     | -6.030 | 0.000 | -0.200        | -0.102    |
| arthritis | 1.789  | 0.060     | 29.860 | 0.000 | 1.672         | 1.906     |
| heartdis  | 0.365  | 0.088     | 4.160  | 0.000 | 0.193         | 0.537     |
| diabetes  | 0.452  | 0.078     | 5.780  | 0.000 | 0.299         | 0.606     |
| ld        | 0.355  | 0.098     | 3.630  | 0.000 | 0.163         | 0.547     |
| cancer    | 0.096  | 0.094     | 1.020  | 0.308 | -0.089        | 0.281     |
| stroke    | 0.389  | 0.133     | 2.930  | 0.003 | 0.128         | 0.650     |
| obese     | 0.437  | 0.063     | 6.910  | 0.000 | 0.313         | 0.561     |
| depressed | 0.999  | 0.062     | 16.030 | 0.000 | 0.877         | 1.121     |
| _cons     | -0.661 | 0.236     | -2.800 | 0.005 | -1.123        | -0.199    |

## Sweden

|           | Coef.  | Std. Err. | z      | P>z   | [95%<br>Conf. | Interval] |
|-----------|--------|-----------|--------|-------|---------------|-----------|
| time      | 0.046  | 0.031     | 1.500  | 0.134 | -0.014        | 0.106     |
| age       | -0.011 | 0.003     | -3.170 | 0.002 | -0.018        | -0.004    |
| female    | 0.481  | 0.062     | 7.720  | 0.000 | 0.359         | 0.603     |
| married   | -0.083 | 0.066     | -1.260 | 0.206 | -0.212        | 0.046     |
| education | -0.128 | 0.020     | -6.230 | 0.000 | -0.168        | -0.088    |
| arthritis | 1.721  | 0.071     | 24.110 | 0.000 | 1.581         | 1.861     |
| heartdis  | 0.342  | 0.099     | 3.460  | 0.001 | 0.148         | 0.536     |
| diabetes  | 0.059  | 0.103     | 0.570  | 0.566 | -0.142        | 0.260     |
| ld        | 0.523  | 0.139     | 3.770  | 0.000 | 0.251         | 0.795     |
| cancer    | 0.261  | 0.116     | 2.250  | 0.025 | 0.033         | 0.489     |
| stroke    | 0.369  | 0.128     | 2.880  | 0.004 | 0.118         | 0.620     |
| obese     | 0.580  | 0.083     | 6.970  | 0.000 | 0.417         | 0.744     |
| depressed | 0.753  | 0.075     | 9.980  | 0.000 | 0.605         | 0.901     |
| _cons     | -0.282 | 0.279     | -1.010 | 0.313 | -0.829        | 0.266     |

## Spain

|           | Coef.  | Std. Err. | z      | P>z   | [95%<br>Conf. | Interval] |
|-----------|--------|-----------|--------|-------|---------------|-----------|
| time      | 0.048  | 0.048     | 1.020  | 0.309 | -0.045        | 0.142     |
| age       | 0.010  | 0.005     | 1.950  | 0.051 | 0.000         | 0.019     |
| female    | 0.605  | 0.099     | 6.090  | 0.000 | 0.410         | 0.799     |
| married   | 0.103  | 0.106     | 0.970  | 0.332 | -0.105        | 0.310     |
| education | -0.110 | 0.038     | -2.920 | 0.004 | -0.184        | -0.036    |
| arthritis | 1.908  | 0.112     | 17.020 | 0.000 | 1.688         | 2.128     |
| heartdis  | 0.491  | 0.159     | 3.090  | 0.002 | 0.179         | 0.802     |
| diabetes  | 0.489  | 0.119     | 4.110  | 0.000 | 0.256         | 0.722     |
| ld        | 0.237  | 0.186     | 1.280  | 0.201 | -0.127        | 0.601     |
| cancer    | 0.358  | 0.264     | 1.350  | 0.176 | -0.160        | 0.876     |
| stroke    | 0.266  | 0.257     | 1.040  | 0.299 | -0.237        | 0.769     |
| obese     | 0.311  | 0.118     | 2.630  | 0.009 | 0.079         | 0.543     |
| depressed | 1.030  | 0.105     | 9.820  | 0.000 | 0.824         | 1.235     |
| _cons     | -1.702 | 0.409     | -4.160 | 0.000 | -2.505        | -0.900    |

# Italy

|           | Coef.  | Std. Err. | z      | P>z   | [95%<br>Conf. | Interval] |
|-----------|--------|-----------|--------|-------|---------------|-----------|
| time      | 0.015  | 0.030     | 0.520  | 0.605 | -0.043        | 0.074     |
| age       | 0.026  | 0.003     | 7.670  | 0.000 | 0.019         | 0.033     |
| female    | 0.531  | 0.061     | 8.730  | 0.000 | 0.412         | 0.651     |
| married   | 0.076  | 0.074     | 1.030  | 0.301 | -0.068        | 0.221     |
| education | -0.099 | 0.024     | -4.130 | 0.000 | -0.145        | -0.052    |
| arthritis | 2.110  | 0.098     | 21.550 | 0.000 | 1.918         | 2.302     |
| heartdis  | 0.171  | 0.102     | 1.680  | 0.093 | -0.028        | 0.370     |
| diabetes  | 0.425  | 0.093     | 4.590  | 0.000 | 0.244         | 0.606     |
| ld        | 0.474  | 0.137     | 3.460  | 0.001 | 0.205         | 0.742     |
| cancer    | 0.481  | 0.153     | 3.140  | 0.002 | 0.181         | 0.781     |
| stroke    | 0.242  | 0.210     | 1.150  | 0.250 | -0.170        | 0.654     |
| obese     | 0.442  | 0.083     | 5.350  | 0.000 | 0.280         | 0.604     |
| depressed | 0.757  | 0.068     | 11.150 | 0.000 | 0.624         | 0.890     |
| _cons     | -2.564 | 0.270     | -9.510 | 0.000 | -3.093        | -2.035    |

# France

|           | Coef.  | Std. Err. | z      | P>z   | [95%<br>Conf. | Interval] |
|-----------|--------|-----------|--------|-------|---------------|-----------|
| time      | -0.046 | 0.029     | -1.580 | 0.113 | -0.103        | 0.011     |
| age       | -0.004 | 0.003     | -1.250 | 0.212 | -0.010        | 0.002     |
| female    | 0.096  | 0.062     | 1.550  | 0.121 | -0.025        | 0.217     |
| married   | 0.005  | 0.064     | 0.080  | 0.933 | -0.121        | 0.132     |
| education | -0.059 | 0.018     | -3.230 | 0.001 | -0.094        | -0.023    |
| arthritis | 1.966  | 0.068     | 28.720 | 0.000 | 1.832         | 2.101     |
| heartdis  | 0.268  | 0.092     | 2.920  | 0.004 | 0.088         | 0.448     |
| diabetes  | 0.251  | 0.092     | 2.710  | 0.007 | 0.069         | 0.432     |
| ld        | 0.439  | 0.130     | 3.370  | 0.001 | 0.184         | 0.695     |
| cancer    | 0.314  | 0.143     | 2.190  | 0.028 | 0.033         | 0.595     |
| stroke    | 0.178  | 0.165     | 1.080  | 0.278 | -0.144        | 0.501     |
| obese     | 0.372  | 0.076     | 4.920  | 0.000 | 0.224         | 0.520     |
| depressed | 0.765  | 0.065     | 11.840 | 0.000 | 0.638         | 0.891     |
| _cons     | -0.393 | 0.249     | -1.580 | 0.115 | -0.881        | 0.095     |

# Denmark

|           | Coef.  | Std. Err. | z      | P>z   | [95%<br>Conf. | Interval] |
|-----------|--------|-----------|--------|-------|---------------|-----------|
| time      | 0.071  | 0.029     | 2.460  | 0.014 | 0.014         | 0.128     |
| age       | -0.013 | 0.003     | -4.130 | 0.000 | -0.019        | -0.007    |
| female    | 0.214  | 0.059     | 3.630  | 0.000 | 0.099         | 0.330     |
| married   | 0.013  | 0.063     | 0.210  | 0.830 | -0.110        | 0.137     |
| education | -0.073 | 0.022     | -3.340 | 0.001 | -0.117        | -0.030    |
| arthritis | 1.775  | 0.062     | 28.460 | 0.000 | 1.653         | 1.898     |
| heartdis  | 0.228  | 0.101     | 2.260  | 0.024 | 0.031         | 0.426     |
| diabetes  | 0.181  | 0.109     | 1.650  | 0.099 | -0.034        | 0.395     |
| ld        | 0.445  | 0.103     | 4.320  | 0.000 | 0.243         | 0.646     |
| cancer    | -0.043 | 0.138     | -0.310 | 0.758 | -0.314        | 0.229     |
| stroke    | 0.087  | 0.162     | 0.540  | 0.593 | -0.231        | 0.405     |
| obese     | 0.528  | 0.077     | 6.830  | 0.000 | 0.376         | 0.679     |
| depressed | 1.069  | 0.074     | 14.460 | 0.000 | 0.924         | 1.214     |
| _cons     | -0.684 | 0.250     | -2.730 | 0.006 | -1.174        | -0.193    |

# Switzerland

|           | Coef.  | Std. Err. | z      | P>z   | [95%<br>Conf. | Interval] |
|-----------|--------|-----------|--------|-------|---------------|-----------|
| time      | 0.072  | 0.037     | 1.960  | 0.050 | 0.000         | 0.144     |
| age       | -0.003 | 0.004     | -0.690 | 0.490 | -0.010        | 0.005     |
| female    | 0.147  | 0.077     | 1.910  | 0.056 | -0.004        | 0.299     |
| married   | -0.210 | 0.077     | -2.740 | 0.006 | -0.361        | -0.060    |
| education | -0.056 | 0.034     | -1.660 | 0.097 | -0.123        | 0.010     |
| arthritis | 1.907  | 0.080     | 23.850 | 0.000 | 1.751         | 2.064     |
| heartdis  | 0.449  | 0.149     | 3.010  | 0.003 | 0.157         | 0.742     |
| diabetes  | 0.375  | 0.133     | 2.820  | 0.005 | 0.115         | 0.636     |
| ld        | 0.561  | 0.170     | 3.300  | 0.001 | 0.228         | 0.894     |
| cancer    | 0.474  | 0.196     | 2.420  | 0.016 | 0.090         | 0.859     |
| stroke    | 0.318  | 0.271     | 1.180  | 0.240 | -0.212        | 0.849     |
| obese     | 0.333  | 0.099     | 3.360  | 0.001 | 0.139         | 0.527     |
| depressed | 0.991  | 0.092     | 10.830 | 0.000 | 0.812         | 1.171     |
| _cons     | -1.414 | 0.332     | -4.260 | 0.000 | -2.064        | -0.764    |

# Belgium

|           | Coef.  | Std. Err. | z      | P>z   | [95%<br>Conf. | Interval] |
|-----------|--------|-----------|--------|-------|---------------|-----------|
| time      | 0.047  | 0.029     | 1.620  | 0.105 | -0.010        | 0.103     |
| age       | -0.017 | 0.003     | -5.720 | 0.000 | -0.023        | -0.011    |
| female    | 0.200  | 0.059     | 3.380  | 0.001 | 0.084         | 0.317     |
| married   | -0.031 | 0.063     | -0.490 | 0.621 | -0.155        | 0.092     |
| education | -0.106 | 0.019     | -5.670 | 0.000 | -0.143        | -0.069    |
| arthritis | 1.736  | 0.060     | 28.870 | 0.000 | 1.618         | 1.854     |
| heartdis  | 0.267  | 0.086     | 3.110  | 0.002 | 0.099         | 0.436     |
| diabetes  | 0.037  | 0.093     | 0.400  | 0.690 | -0.145        | 0.220     |
| ld        | 0.261  | 0.104     | 2.510  | 0.012 | 0.057         | 0.466     |
| cancer    | 0.328  | 0.127     | 2.590  | 0.010 | 0.080         | 0.577     |
| stroke    | 0.150  | 0.145     | 1.030  | 0.301 | -0.134        | 0.434     |
| obese     | 0.266  | 0.070     | 3.780  | 0.000 | 0.128         | 0.404     |
| depressed | 0.782  | 0.064     | 12.290 | 0.000 | 0.657         | 0.906     |
| _cons     | 0.249  | 0.251     | 0.990  | 0.321 | -0.242        | 0.740     |

# Czech

|           | Coef.  | Std. Err. | z      | P>z   | [95%<br>Conf. | Interval] |
|-----------|--------|-----------|--------|-------|---------------|-----------|
| time      | 0.175  | 0.045     | 3.880  | 0.000 | 0.087         | 0.263     |
| age       | 0.010  | 0.006     | 1.760  | 0.079 | -0.001        | 0.021     |
| female    | 0.067  | 0.095     | 0.700  | 0.483 | -0.119        | 0.252     |
| married   | 0.063  | 0.097     | 0.650  | 0.516 | -0.127        | 0.253     |
| education | -0.141 | 0.039     | -3.640 | 0.000 | -0.217        | -0.065    |
| arthritis | 1.704  | 0.093     | 18.260 | 0.000 | 1.521         | 1.887     |
| heartdis  | 0.404  | 0.111     | 3.640  | 0.000 | 0.186         | 0.621     |
| diabetes  | 0.398  | 0.099     | 4.030  | 0.000 | 0.204         | 0.591     |
| ld        | 0.540  | 0.118     | 4.560  | 0.000 | 0.308         | 0.773     |
| cancer    | 0.255  | 0.141     | 1.800  | 0.071 | -0.022        | 0.532     |
| stroke    | 0.303  | 0.141     | 2.150  | 0.031 | 0.027         | 0.578     |
| obese     | 0.282  | 0.104     | 2.700  | 0.007 | 0.078         | 0.486     |
| depressed | 1.139  | 0.111     | 10.300 | 0.000 | 0.922         | 1.355     |
| _cons     | -1.380 | 0.439     | -3.140 | 0.002 | -2.241        | -0.519    |

# Luxembourg

|           | Coef.  | Std. Err. | z      | P>z   | [95%<br>Conf. | Interval] |
|-----------|--------|-----------|--------|-------|---------------|-----------|
| time      | 0.180  | 0.048     | 3.720  | 0.000 | 0.085         | 0.275     |
| age       | -0.017 | 0.005     | -3.110 | 0.002 | -0.027        | -0.006    |
| female    | 0.315  | 0.100     | 3.140  | 0.002 | 0.118         | 0.511     |
| married   | -0.181 | 0.104     | -1.740 | 0.082 | -0.385        | 0.023     |
| education | -0.099 | 0.035     | -2.830 | 0.005 | -0.167        | -0.030    |
| arthritis | 1.545  | 0.098     | 15.760 | 0.000 | 1.353         | 1.737     |
| heartdis  | 0.113  | 0.145     | 0.780  | 0.438 | -0.172        | 0.398     |
| diabetes  | 0.286  | 0.136     | 2.100  | 0.036 | 0.019         | 0.553     |
| ld        | 0.059  | 0.176     | 0.330  | 0.738 | -0.287        | 0.405     |
| cancer    | 0.085  | 0.187     | 0.460  | 0.647 | -0.280        | 0.451     |
| stroke    | 0.429  | 0.278     | 1.540  | 0.123 | -0.117        | 0.974     |
| obese     | 0.385  | 0.111     | 3.460  | 0.001 | 0.167         | 0.603     |
| depressed | 0.961  | 0.110     | 8.710  | 0.000 | 0.745         | 1.177     |
| _cons     | 0.060  | 0.430     | 0.140  | 0.889 | -0.783        | 0.903     |

# Slovenia

|           | Coef.  | Std. Err. | z      | P>z   | [95%<br>Conf. | Interval] |
|-----------|--------|-----------|--------|-------|---------------|-----------|
| time      | 0.041  | 0.032     | 1.270  | 0.205 | -0.022        | 0.104     |
| age       | 0.020  | 0.004     | 5.490  | 0.000 | 0.013         | 0.027     |
| female    | 0.374  | 0.066     | 5.680  | 0.000 | 0.245         | 0.503     |
| married   | 0.195  | 0.076     | 2.570  | 0.010 | 0.046         | 0.343     |
| education | -0.194 | 0.027     | -7.120 | 0.000 | -0.248        | -0.141    |
| arthritis | 1.309  | 0.106     | 12.330 | 0.000 | 1.101         | 1.517     |
| heartdis  | 0.336  | 0.098     | 3.430  | 0.001 | 0.144         | 0.529     |
| diabetes  | -0.031 | 0.088     | -0.350 | 0.728 | -0.204        | 0.143     |
| ld        | 0.327  | 0.152     | 2.150  | 0.032 | 0.029         | 0.626     |
| cancer    | 0.270  | 0.141     | 1.910  | 0.057 | -0.008        | 0.547     |
| stroke    | 0.343  | 0.168     | 2.040  | 0.042 | 0.013         | 0.673     |
| obese     | 0.375  | 0.074     | 5.050  | 0.000 | 0.229         | 0.520     |
| depressed | 0.747  | 0.081     | 9.190  | 0.000 | 0.588         | 0.906     |
| _cons     | -1.517 | 0.303     | -5.000 | 0.000 | -2.111        | -0.923    |

# Estonia

|           | Coef.  | Std. Err. | z      | P>z   | [95%<br>Conf. | Interval] |
|-----------|--------|-----------|--------|-------|---------------|-----------|
| time      | 0.148  | 0.025     | 6.010  | 0.000 | 0.100         | 0.196     |
| age       | -0.003 | 0.003     | -1.150 | 0.252 | -0.008        | 0.002     |
| female    | 0.019  | 0.054     | 0.360  | 0.718 | -0.086        | 0.125     |
| married   | 0.056  | 0.052     | 1.070  | 0.284 | -0.047        | 0.159     |
| education | -0.152 | 0.021     | -7.180 | 0.000 | -0.193        | -0.110    |
| arthritis | 1.579  | 0.066     | 23.860 | 0.000 | 1.449         | 1.708     |
| heartdis  | 0.383  | 0.068     | 5.670  | 0.000 | 0.251         | 0.516     |
| diabetes  | 0.273  | 0.074     | 3.690  | 0.000 | 0.128         | 0.418     |
| ld        | 0.233  | 0.104     | 2.240  | 0.025 | 0.029         | 0.437     |
| cancer    | 0.598  | 0.122     | 4.900  | 0.000 | 0.359         | 0.837     |
| stroke    | 0.313  | 0.117     | 2.690  | 0.007 | 0.085         | 0.542     |
| obese     | 0.319  | 0.056     | 5.720  | 0.000 | 0.209         | 0.428     |
| depressed | 0.801  | 0.054     | 14.870 | 0.000 | 0.696         | 0.907     |
| _cons     | -0.079 | 0.217     | -0.360 | 0.715 | -0.505        | 0.347     |
